# Supplementary material for: TPS Genes Silencing Alters Constitutive Indirect and Direct Defense in Tomato
Source: PubMed Central journal article supplement (PMC6163538; doi:10.3390/ijms19092748), 2018-09-13
Supplement: ijms-19-02748-s001.pdf [file ijms-19-02748-s001.pdf]

Supplementary Materials:

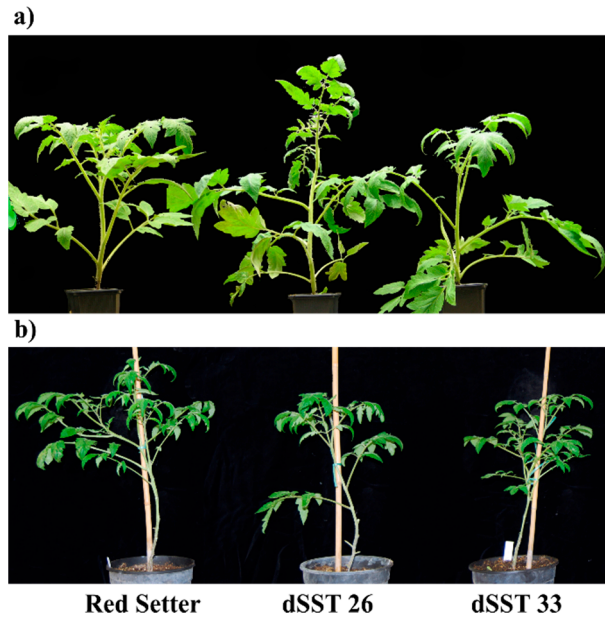

**Figure S1.** Phenotype of the transgenic T1 lines dSST26-33 and relative un-transgenic cultivar “Red Setter” four weeks (a) and eight weeks after sowing (b).

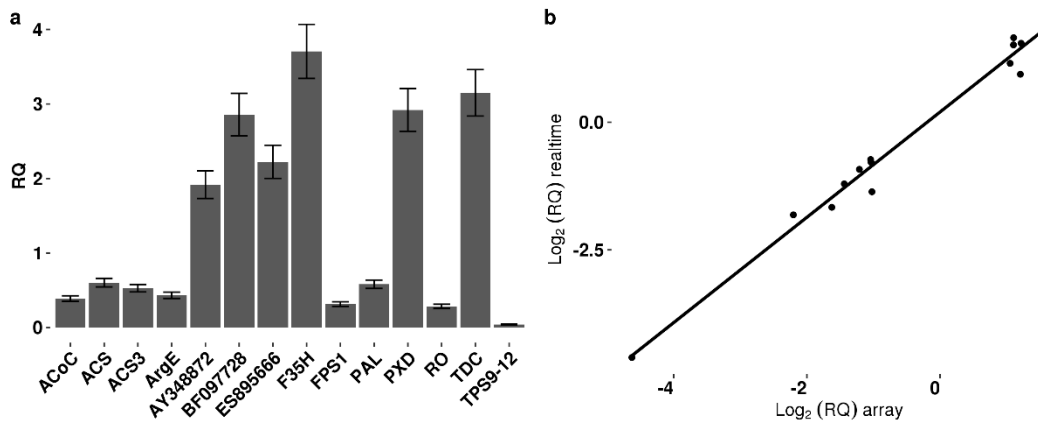

**Figure S2.** Array gene expression verification by real-time RT-PCR. (a) For each gene, the graph displays the relative quantity of the target in transformed plants (white columns) and untransformed control cv ‘Red Setter’ (black columns). Quantities (RQ) are shown relative to the calibrator ‘Red Setter’ genotype. The list of the target genes analyzed is reported on the x-axis; the results of the relative quantification calculations are reported on the y-axis. (b) Points represent fold changes ( $\log_2 RQ$ ) for each gene common between array and real time RT-PCR. The continuous line on graph represents linear regression.

| mRNA/EST ID                       | UniGene ID         | Fold Change    | Gene Ontology Annotation                          | GO terms                                                                                                                                                      | Min. eValue      | Mean Similarity |
|-----------------------------------|--------------------|----------------|---------------------------------------------------|---------------------------------------------------------------------------------------------------------------------------------------------------------------|------------------|-----------------|
| TC197491                          | SGN-U579809        | 2.447          | Cytochrome p450                                   | GO:0009793; GO:0009086;<br>GO:0019745; GO:0000394;<br>GO:0016126                                                                                              | 6.31E-153        | 79.45%          |
| <b>U17972.1<br/>(ACS3)</b>        | <b>SGN-U565891</b> | <b>-2.317</b>  | <b>1-aminocyclopropane-1-carboxylate synthase</b> | GO:0071281; GO:0009693;<br>GO:0009733; GO:0005737;<br>GO:0016847; GO:0042802;<br>GO:0005515                                                                   | <b>0</b>         | <b>90.00%</b>   |
| TA36168_4081                      | SGN-U581138        | 2.634          | 24-sterol c-methyltransferase                     | GO:0006084; GO:0016132;<br>GO:0042398; GO:0009805;<br>GO:0009793; GO:0019745;<br>GO:0009698; GO:0006598;<br>GO:0009611; GO:0016126;<br>GO:0005737; GO:0003838 | 3.49E-73         | 87.10%          |
| DB707884.1                        | SGN-U563783        | -2.075         | beta-ketoacyl- synthase                           | GO:0006633                                                                                                                                                    | 1.49E-42         | 67.00%          |
| <b>AW928749.1<br/>(AcoC)</b>      | <b>SGN-U601457</b> | <b>-2.033</b>  | <b>Acetyl-CoA Carboxylase</b>                     | GO:0009507; GO:0005737;<br>GO:0003989                                                                                                                         | <b>1.72E-68</b>  | <b>76.55%</b>   |
| <b>AW737876.1<br/>(ArgE)</b>      | <b>SGN-U591649</b> | <b>-2.711</b>  | <b>acetylornithine deacetylase</b>                | GO:0006526; GO:0008652                                                                                                                                        | <b>8.46E-107</b> | <b>84.55%</b>   |
| <b>TA40884_4081<br/>(TPS9-11)</b> | <b>SGN-U580988</b> | <b>-25.027</b> | <b>sesquiterpene synthase</b>                     | GO:0051762; GO:0033383                                                                                                                                        | <b>4.75E-117</b> | <b>73.90%</b>   |
| AK327963.1                        | SGN-U576202        | 2.357          | Dolichol kinase                                   | GO:0008150                                                                                                                                                    | 0                | 75.95%          |
| TA54084_4081                      | SGN-U566374        | -2.186         | ap2 erf domain-containing transcription factor    | GO:0009873, GO:0003700,<br>GO:0009753, GO:0009861,<br>GO:0005667, GO:0045449                                                                                  | 4.51E-65         | 76.40%          |

| mRNA/EST ID                        | UniGene ID         | Fold Change   | Gene Ontology Annotation                                                              | GO terms                                                                                    | Min. eValue | Mean Similarity |
|------------------------------------|--------------------|---------------|---------------------------------------------------------------------------------------|---------------------------------------------------------------------------------------------|-------------|-----------------|
| <b>AK328022.1</b><br><b>(F35H)</b> | <b>SGN-U602093</b> | <b>2.896</b>  | <b>flavonoid 3' 5' -hydroxylase</b>                                                   | GO:0009718; GO:0016711                                                                      | <b>0</b>    | <b>94.65%</b>   |
| AK320815.1                         | SGN-U580204        | -2.217        | dna repair protein rad23-3-like                                                       | GO:0007267; GO:0000911;<br>GO:0006281; GO:0006302;<br>GO:0000226; GO:0035196;<br>GO:0006396 | 2.31E-115   | 85.35%          |
| BW692890                           | SGN-U581282        | 2.161         | hsp22                                                                                 | GO:0006457; GO:0009408;<br>GO:0009644; GO:0042542;<br>GO:0009507                            | 1.21E-77    | 75.15%          |
| ES894405.1                         | SGN-U570087        | -2.161        | benzoic acid/salicylic acid methyltransferase                                         | GO:0005739                                                                                  | 1.37E-76    | 78.45%          |
| DB723477.1                         | SGN-U570573        | -2.033        | malic enzyme                                                                          | GO:0005739                                                                                  | 4.97E-83    | 84.95%          |
| CD003371.1                         | SGN-U597254        | -2.157        | uncharacterized protein                                                               | ---NA---                                                                                    | 1.96E-62    | 84.50%          |
| AK321037.1                         | SGN-U574780        | 2.702         | delta-12 fatty acid desaturase                                                        | GO:0046471, GO:0005575,<br>GO:0080167, GO:0006636,<br>GO:0009507, GO:0052637                | 0           | 79.95%          |
| AK325335.1                         | SGN-U574560        | -3.207        | pectinesterase family protein                                                         | GO:0016023                                                                                  | 0           | 66.70%          |
| U50152.1                           | SGN-U577971        | -2.404        | leucine aminopeptidase                                                                | GO:0002213, GO:0009507                                                                      | 0           | 88.45%          |
| <b>AK320453.1</b><br><b>(PXD)</b>  | <b>SGN-U580709</b> | <b>2.323</b>  | <b>peroxidase</b>                                                                     | GO:0002215, GO:0055114,<br>GO:0004601, GO:0020037                                           | <b>0</b>    | <b>88.65%</b>   |
| <b>TC199251</b><br><b>(PAL)</b>    | <b>SGN-U577677</b> | <b>-2.052</b> | <b>phenylalanine ammonia-lyase</b>                                                    | GO:0005737, GO:0045548,<br>GO:0009698, GO:0006559,<br>GO:0006570, GO:0009821                | <b>0</b>    | <b>92.85%</b>   |
| AK319177.1                         | SGN-U574365        | 2.832         | serine threonine protein phosphatase 2a 57 kda regulatory subunit b iota isoform-like | GO:0005515, GO:0005618,<br>GO:0050832, GO:0006952,<br>GO:0007165                            | 0           | 84.25%          |

| mRNA/EST ID            | UniGene ID         | Fold Change   | Gene Ontology Annotation                            | GO terms                                                                                                                                                                           | Min. eValue     | Mean Similarity |
|------------------------|--------------------|---------------|-----------------------------------------------------|------------------------------------------------------------------------------------------------------------------------------------------------------------------------------------|-----------------|-----------------|
| TC210229               | SGN-U580850        | 2.329         | Pyruvate kinase                                     | GO:0016310, GO:0009507                                                                                                                                                             |                 |                 |
| TC215254               |                    | -2.138        | hypothetical protein VITISV_024659 [Vitis vinifera] | ---NA---                                                                                                                                                                           | 6.69E-63        | 82.00%          |
| BI931808.1             | SGN-U584472        | -2.155        | regulatory-associated protein of tor 1-like         | ---NA---                                                                                                                                                                           | 2.12E-139       | 87.85%          |
| TC192744               | SGN-U579243        | 2.173         | 60s ribosomal protein l10a                          | GO:0022625, GO:0005622, GO:0005840, GO:0006412, GO:0003735, GO:0042254, GO:0005737, GO:0052544; GO:0042742; GO:0050832; GO:0016045; GO:0009595; GO:0009867; GO:0000165; GO:0010310 | 1.92E-121       | 94.05%          |
| <b>AA824781 (TDC)</b>  | <b>SGN-U598816</b> | <b>2.148</b>  | <b>tryptophan decarboxylase</b>                     | GO:0006511, GO:0004842, GO:0005739, GO:0012505, GO:0008289, GO:0006869, GO:0006810                                                                                                 | <b>3.29E-70</b> | <b>84.95%</b>   |
| TC192232               | SGN-U573178        | 3.796         | ubiquitin-activating enzyme                         | GO:0006511, GO:0004842                                                                                                                                                             | 1.13E-127       | 89.65%          |
| BI210771               | SGN-U593459        | 2.028         | ubiquinol--cytochrome-c reductase - like protein    | GO:0005739                                                                                                                                                                         | 6.04E-38        | 89.90%          |
| TC197326               |                    | -17.556       | cysteine protease inhibitor                         | GO:0012505, GO:0008289, GO:0006869, GO:0006810                                                                                                                                     | 4.55E-150       | 93.50%          |
| AW219265.1             | SGN-U591461        | -4.909        | uncharacterized protein                             | ---NA---                                                                                                                                                                           | 3.18E-11        | 58.13%          |
| <b>BP881050.1 (RO)</b> | <b>SGN-U597634</b> | <b>-4.604</b> | <b>Reticulin oxidase</b>                            | GO:0055074; GO:0006457; GO:0046686; GO:0009408; GO:0042542; GO:0006979; GO:0009651                                                                                                 | <b>2.35E-22</b> | <b>82.40%</b>   |
| TC208821               | SGN-U568521        | -3.999        | long-chain-alcohol oxidase fao1-like                | GO:0006066; GO:0055114; GO:0043231; GO:0009055; GO:0046577                                                                                                                         | 8.98E-70        | 69.70%          |

| mRNA/EST ID                 | UniGene ID         | Fold Change   | Gene Ontology Annotation                    | GO terms                                                                                                               | Min. eValue | Mean Similarity |
|-----------------------------|--------------------|---------------|---------------------------------------------|------------------------------------------------------------------------------------------------------------------------|-------------|-----------------|
| AW737824.1                  | SGN-U597233        | -3.818        | 2pgk 2-phosphoglycerate kinase              | GO:0006096; GO:0046685;<br>GO:0046686; GO:0034976;<br>GO:0048046; GO:0009570                                           | 1.47E-36    | 87.75%          |
| BG134534.1                  | SGN-U579280        | -3.811        | formate dehydrogenase                       | GO:0009507, GO:0005739,<br>GO:0016616                                                                                  | 3.29E-10    | 60.20%          |
| AK327523.1                  | SGN-U583362        | -3.735        | s-locus linked f-box protein type-3         | GO:0005515, GO:0005488                                                                                                 | 2.28E-48    | 46.60%          |
| AK246698.1                  | SGN-U592051        | -3.529        | maf-like protein                            | ---NA---<br>GO:0006084; GO:0016132;<br>GO:0006816; GO:0030003;                                                         | 1.11E-92    | 80.20%          |
| <b>AK324941.1<br/>(FPS)</b> | <b>SGN-U580757</b> | <b>-3.089</b> | <b>farnesyl diphosphate synthase</b>        | GO:0042398; GO:0045337;<br>GO:0009698                                                                                  | <b>0</b>    | <b>89.40%</b>   |
| BT014156.1                  | SGN-U583400        | -3.262        | ---NA---                                    | ---NA---                                                                                                               |             |                 |
| BF050158.1                  | SGN-U573768        | -3.235        | rna-dependent rna polymerase family protein | GO:0003968, GO:0016441,<br>GO:0016740, GO:0050789                                                                      | 1.77E-28    | 58.60%          |
| TC214521                    | SGN-U584654        | -3.213        | protein cobra-like                          | GO:0016023                                                                                                             | 1.99E-153   | 90.45%          |
| TC213108                    | SGN-U563907        | -3.135        | seed storage protein vicilin partial        | ---NA---                                                                                                               | 1.46E-91    | 64.25%          |
| AW622775.1                  | SGN-U598495        | -3.132        | predicted protein [Populus trichocarpa]     | ---NA---                                                                                                               | 6.54E-06    | 53.00%          |
| AW036162.1                  | SGN-U597479        | -3.062        | ---NA---                                    | ---NA---                                                                                                               |             |                 |
| BE431535.1                  | SGN-U601336        | -2.921        | Porin autotransporter (AT) family           | GO:0019344, GO:0009086,<br>GO:0010043, GO:0000394,<br>GO:0005737, GO:0005783,<br>GO:0005794, GO:0005773,<br>GO:0004046 | 1.36E-25    | 93.40%          |

| mRNA/EST ID | UniGene ID  | Fold Change | Gene Ontology Annotation                                    | GO terms                                                                                                                                          | Min. eValue | Mean Similarity |
|-------------|-------------|-------------|-------------------------------------------------------------|---------------------------------------------------------------------------------------------------------------------------------------------------|-------------|-----------------|
| BG133638.1  | SGN-U579572 | -2.917      | pathogenesis-related protein STH-2                          | GO:0006355, GO:0005634,<br>GO:0005515, GO:0003700,<br>GO:0008270                                                                                  |             |                 |
| AW933519.1  | SGN-U598660 | -2.728      | pentatricopeptide repeat-containing protein                 | GO:0003674, GO:0005575,<br>GO:0008150                                                                                                             | 1.25E-04    | 64.00%          |
| AK328086.1  | SGN-U602225 | -2.692      | F-box family protein                                        | GO:0005739                                                                                                                                        | 4.27E-163   | 73.70%          |
| BI209303.1  |             | -2.650      | gag-pol polyprotein                                         | GO:0006310; GO:0006278;<br>GO:0003677; GO:0004523;<br>GO:0012505, GO:0016987,<br>GO:0017111, GO:0051301,<br>GO:0051645, GO:0051646,<br>GO:0005524 | 3.19E-101   | 62.95%          |
| BP908250.1  | SGN-U597898 | -2.629      | myosin subfamily xi heavy chain                             | GO:0005524                                                                                                                                        | 1.76E-68    | 89.35%          |
| AK322282.1  | SGN-U568388 | -2.607      | ---NA---                                                    | ---NA---                                                                                                                                          |             |                 |
| DB684494.1  | SGN-U603706 | -2.596      | transcription factor tcp14-like                             | GO:0030154; GO:0009793;<br>GO:0016226; GO:0048366;<br>GO:0009965; GO:0009657                                                                      | 1.52E-125   | 70.25%          |
| BP907314.1  | SGN-U564379 | -2.560      | 2-oxo acid lipoyl-binding site                              | GO:0005739                                                                                                                                        | 5.84E-68    | 76.95%          |
| AW624572.1  | SGN-U577570 | -2.559      | Ribulose 1,5-bifosphate carboxylase/oxygenase<br>activase 2 | GO:0015977, GO:0009573,<br>GO:0009536                                                                                                             |             |                 |
| TC215043    | SGN-U580407 | -2.554      | ALF5 aberrant lateral root formation 5 antiporter           | ---NA---                                                                                                                                          |             |                 |
| TC216107    | SGN-U574155 | -2.525      | glycine-rich rna-binding protein                            | GO:0045087, GO:0009737,<br>GO:0009409, GO:0009651,<br>GO:0010043, GO:0005618,<br>GO:0003676                                                       | 3.90E-36    | 77.70%          |
| BP907391.1  | SGN-U572701 | -2.515      | AF378084_1PNCBP [Solanum tuberosum]                         | ---NA---                                                                                                                                          | 3.43E-73    | 82.00%          |

| mRNA/EST ID | UniGene ID  | Fold Change | Gene Ontology Annotation                                    | GO terms                                                                                                   | Min. eValue | Mean Similarity |
|-------------|-------------|-------------|-------------------------------------------------------------|------------------------------------------------------------------------------------------------------------|-------------|-----------------|
| BP876774.1  | SGN-U597637 | -2.494      | abscisic insensitive 1b                                     | GO:0051301, GO:0048825, GO:0009790, GO:0009740, GO:0009686, GO:0031930, GO:0009657, GO:0045893, GO:0006355 | 1.10E-23    | 62.30%          |
| AK327977.1  | SGN-U578327 | -2.485      | cbs domain protein                                          | GO:0045454, GO:0006096, GO:0007030, GO:0006972, GO:0046686, GO:0009651, GO:0009266, GO:0006833             | 2.49E-41    | 74.55%          |
| AA824688.1  | SGN-U604678 | -2.470      | chromatin remodeling complex subunit                        | GO:0006338, GO:0048573, GO:0040029, GO:0005634, GO:0016514, GO:0003677, GO:0005515                         | 4.67E-58    | 100.00%         |
| AK246590.1  | SGN-U578028 | -2.420      | glycine-rich rna-binding protein 2                          | GO:0045087, GO:0009737, GO:0009409, GO:0009651, GO:0010043, GO:0005618, GO:0003676                         | 1.01E-78    | 83.00%          |
| TC211674    | SGN-U566586 | -2.415      | Zinc ion binding                                            | GO:0008270, GO:0055114                                                                                     | 1.97E-18    | 47.60%          |
| BI210263.1  | SGN-U602079 | -2.398      | ABI2 ABA insensitive 2 protein serine/threonine phpsphatase | GO:0010152, GO:0006355, GO:0009737, GO:0009409, GO:0009651, GO:0009414, GO:0005634                         |             |                 |

| mRNA/EST ID | UniGene ID  | Fold Change | Gene Ontology Annotation                                  | GO terms                                                                                                                           | Min. eValue | Mean Similarity |
|-------------|-------------|-------------|-----------------------------------------------------------|------------------------------------------------------------------------------------------------------------------------------------|-------------|-----------------|
| CD002235.1  | SGN-U600207 | -2.365      | atpase splayed                                            | GO:0015991, GO:0006486,<br>GO:0015992, GO:0010119,<br>GO:0009737, GO:0009414,<br>GO:0005794, GO:0016021<br>GO:0016740, GO:0016020, | 4.96E-18    | 88.95%          |
| DB706064.1  | SGN-U579949 | -2.361      | Cellulose synthase-like protein G3                        | GO:0016757, GO:0016759,<br>GO:0016760, GO:0043170<br>GO:0007020, GO:0000930,                                                       | 1.43E-88    | 78.45%          |
| BG629748.1  | SGN-U584382 | -2.361      | spc97 spc98 family of spindle pole body component         | GO:0009898, GO:0005635,<br>GO:0015631<br>GO:0000910, GO:0051781,                                                                   | 1.22E-19    | 62.64%          |
| TC193947    |             | -2.355      | er auxin binding protein 1 precursor                      | GO:0045793, GO:0032877,<br>GO:0009826, GO:0010011<br>GO:0047501, GO:0005886,                                                       | 5.32E-15    | 90.00%          |
| TC209356    | SGN-U581798 | -2.347      | short-chain dehydrogenase/reductase SDR family protein    | GO:0005829, GO:0009744,<br>GO:0080167, GO:0055114,<br>GO:0009813, GO:0006952                                                       | 1.49E-78    | 69.20%          |
| BE432867.1  | SGN-U570176 | -2.340      | ---NA---                                                  |                                                                                                                                    |             |                 |
| TC212535    | SGN-U579923 | -2.332      | e3 ubiquitin-protein ligase ubr4                          | GO:0006511, GO:0004842                                                                                                             | 7.49E-107   | 81.85%          |
| BG630161.1  | SGN-U604261 | -2.332      | ---NA---                                                  | ---NA---                                                                                                                           |             |                 |
| AW615915.1  | SGN-U603473 | -2.321      | potyviral helper component protease-interacting protein 1 | GO:0005739                                                                                                                         | 3.79E-76    | 66.40%          |
| AK247833.1  | SGN-U576138 | -2.315      | uncharacterized protein                                   | ---NA---                                                                                                                           | 4.39E-44    | 59.00%          |
| AW443638.1  | SGN-U598572 | -2.302      | beta-glucosidase 44-like                                  | GO:0005618, GO:0005975,<br>GO:0004565, GO:0009505                                                                                  | 5.14E-15    | 42.88%          |



| mRNA/EST ID | UniGene ID  | Fold Change | Gene Ontology Annotation                      | GO terms                                                                                                                                                      | Min. eValue | Mean Similarity |
|-------------|-------------|-------------|-----------------------------------------------|---------------------------------------------------------------------------------------------------------------------------------------------------------------|-------------|-----------------|
| BT013974.1  | SGN-U570151 | -2.298      | rna recognition motif-containing protein      | GO:0005739                                                                                                                                                    | 0           | 79.55%          |
| AK323609.1  | SGN-U570482 | -2.295      | Kinesin heavy chain isolog                    | GO:0055046, GO:0048451,<br>GO:0000914, GO:0080175,<br>GO:0048453, GO:0009524,<br>GO:0003777, GO:0008574                                                       | 3.16E-81    | 66.85%          |
| BE354788.1  | SGN-U578389 | -2.293      | kunitz-type protease inhibitor precursor      | GO:0050832, GO:0009620,<br>GO:0009751, GO:0004867                                                                                                             | 5.62E-51    | 65.85%          |
| AI898032.1  | SGN-U563285 | -2.279      | homeodomain-leucine zipper protein            | GO:0006355, GO:0005634,<br>GO:0003677                                                                                                                         | 4.87E-65    | 78.35%          |
| TC216008    | SGN-U574197 | -2.276      | o-acyltransferase (wsd1-like) family protein  | GO:0010025, GO:0005783,<br>GO:0004144, GO:0047196                                                                                                             | 1.15E-50    | 63.05%          |
| TC210351    | SGN-U586176 | -2.274      | uncharacterized protein                       | ---NA---                                                                                                                                                      | 4.07E-30    | 49.06%          |
| BI207234.1  | SGN-U599925 | -2.251      | Zinc finger CCCH domain-containing protein 24 | GO:0009793, GO:0006355,<br>GO:0005634, GO:0003676,<br>GO:0003700                                                                                              |             |                 |
| BG626093.1  | SGN-U571622 | -2.245      | lysine histidine transporter                  | GO:0043090, GO:0006865,<br>GO:0015696, GO:0006820,<br>GO:0015802, GO:0030968,<br>GO:0006888, GO:0006499,<br>GO:0043069, GO:0006862,<br>GO:0006612, GO:0043269 | 2.56E-25    | 83.15%          |
| DB694047.1  | SGN-U574293 | -2.232      | Nucleic acid binding                          | GO:0006355, GO:0003677                                                                                                                                        | 2.05E-59    | 80.75%          |

| mRNA/EST ID  | UniGene ID  | Fold Change | Gene Ontology Annotation                   | GO terms                                                                                                                                                                                                                                       | Min. eValue | Mean Similarity |
|--------------|-------------|-------------|--------------------------------------------|------------------------------------------------------------------------------------------------------------------------------------------------------------------------------------------------------------------------------------------------|-------------|-----------------|
| TA53846_4081 | SGN-U571987 | -2.225      | Ankyrin repeat-domain containing protein 2 | GO:0042742, GO:0050832,<br>GO:0045087, GO:0009867,<br>GO:0000165, GO:0031348,<br>GO:0043069, GO:0006612,<br>GO:0010310, GO:0045088,<br>GO:0010363, GO:0009751,<br>GO:0009697, GO:0009862<br>GO:0006338, GO:0048573,<br>GO:0040029, GO:0005634, | 4.87E-84    | 98.40%          |
| BF097872.1   | SGN-U565631 | -2.220      | chromatin remodeling complex subunit       | GO:0016514, GO:0003677,<br>GO:0005515<br>GO:0072583, GO:0009737,<br>GO:0009504, GO:0005737,                                                                                                                                                    | 4.10E-32    | 87.80%          |
| FS197580.1   | SGN-U601965 | -2.220      | dynamamin-like protein                     | GO:0005829, GO:0005886<br>GO:0005515                                                                                                                                                                                                           | 2.68E-36    | 51.05%          |
| DB691535.1   | SGN-U602213 | -2.218      | protein binding                            | GO:0012505, GO:0016987,<br>GO:0017111, GO:0051301,                                                                                                                                                                                             | 3.72E-36    | 60.30%          |
| AW621582.1   | SGN-U586258 | -2.215      | myosin heavy chain-like protein            | GO:0051645, GO:0051646,<br>GO:0005524<br>GO:0012505, GO:0004672,<br>GO:0010204, GO:0010359,                                                                                                                                                    | 0           | 70.45%          |
| TC213299     | SGN-U574928 | -2.210      | serine threonine-protein kinase nek5-like  | GO:0005515, GO:0005524,<br>GO:0004674, GO:0009626,<br>GO:0016301                                                                                                                                                                               | 0           | 66.65%          |
| AK325646.1   | SGN-U579091 | -2.189      | Legumin type B                             | ---NA---                                                                                                                                                                                                                                       | 0           | 66.65%          |

| mRNA/EST ID  | UniGene ID  | Fold Change | Gene Ontology Annotation                     | GO terms                                                                                                                           | Min. eValue | Mean Similarity |
|--------------|-------------|-------------|----------------------------------------------|------------------------------------------------------------------------------------------------------------------------------------|-------------|-----------------|
| TC191894     | SGN-U572061 | -2.188      | Embryo defective 1507 ATP binding            | ---NA---                                                                                                                           |             |                 |
| TC204487     |             | -2.182      | proteinase inhibitor ii                      | GO:0009737, GO:0009607,<br>GO:0009651, GO:0009611                                                                                  | 5.33E-96    | 88.15%          |
| AK324068.1   | SGN-U570419 | -2.159      | uncharacterized protein                      | ---NA---                                                                                                                           | 4.56E-107   | 70.45%          |
| AJ784473.1   | SGN-U599708 | -2.154      | Zinc finger C3HC4 family protein             | GO:0010200, GO:0005759,<br>GO:0008270, GO:0009737<br>GO:0005737, GO:0005829,                                                       |             |                 |
| TA38641_4081 | SGN-U578022 | -2.148      | eukaryotic translation initiation factor 3   | GO:0005852, GO:0005634,<br>GO:0003676, GO:0003743<br>GO:0042742, GO:0050832,<br>GO:0009595, GO:0009813,<br>GO:0045087, GO:0009867, | 2.06E-48    | 71.90%          |
| DY523815.1   | SGN-U599172 | -2.146      | DMR6 Downy Mildew Resistant 6 oxidoreductase | GO:0000165, GO:0031348,<br>GO:0006612, GO:0031347,<br>GO:0010310, GO:0043900,<br>GO:0010363, GO:0009617                            | 1.02E-25    | 65.00%          |
| DV105496.1   | SGN-U568689 | -2.144      | pumilio homolog 2-like                       | GO:0009507<br>GO:0009653, GO:0051301,<br>GO:0000902, GO:0048869,<br>GO:0010106, GO:0043622,<br>GO:0006826, GO:0010150,             | 2.14E-27    | 66.20%          |
| BM411846.1   | SGN-U575359 | -2.142      | microtubule-associated protein               | GO:0031115, GO:0015706,<br>GO:0009737, GO:0009409,<br>GO:0010167, GO:0010038,<br>GO:0009739                                        | 1.04E-12    | 52.13%          |

| mRNA/EST ID | UniGene ID  | Fold Change | Gene Ontology Annotation               | GO terms                                                                                                               | Min. eValue | Mean Similarity |
|-------------|-------------|-------------|----------------------------------------|------------------------------------------------------------------------------------------------------------------------|-------------|-----------------|
| BT013019.1  | SGN-U575406 | -2.137      | protein seuss-like 2                   | GO:0009790, GO:0048467,<br>GO:0048481, GO:0005634                                                                      | 0           | 81.30%          |
| BG627845.1  | SGN-U565937 | -2.136      | ---NA---                               | ---NA---                                                                                                               |             |                 |
| TC212033    | SGN-U586258 | -2.130      | centromeric protein                    | ---NA---                                                                                                               | 5.78E-22    | 58.00%          |
| TC207785    | SGN-U575481 | -2.126      | serine threonine-protein kinase        | GO:0012505, GO:0004672,<br>GO:0010204, GO:0010359,<br>GO:0005515, GO:0005524,<br>GO:0004674, GO:0009626,<br>GO:0016301 | 5.63E-15    | 70.33%          |
| AK247811.1  | SGN-U598287 | -2.115      | ADL3 Arabidopsis dynamin-like 3 GTPase | GO:0072583, GO:0009737,<br>GO:0009504, GO:0005737,<br>GO:0005829, GO:0005886                                           | 2.73E-10    | 58.20%          |
| AK325681.1  | SGN-U582785 | -2.112      | rna-binding protein 5 10               | GO:0009507, GO:0005737,<br>GO:0005634, GO:0008143,<br>GO:0003723                                                       | 0           | 76.70%          |
| BW686630.1  | SGN-U592836 | -2.096      | ---NA---                               | ---NA---                                                                                                               |             |                 |
| BG629468.1  | SGN-U599643 | -2.092      | DNA replication ATP-dependent helicase | GO:0005634, GO:0008026                                                                                                 |             |                 |
| AI490908.1  | SGN-U570811 | -2.090      | o-acyltransferase wsd1-like            | GO:0010025, GO:0005783,<br>GO:0004144, GO:0047196                                                                      | 5.94E-60    | 69.95%          |
| BI926635.1  | SGN-U602785 | -2.090      | receptor protein                       | GO:0007165, GO:0005768,<br>GO:0005794, GO:0005886,<br>GO:0005802                                                       | 2.42E-102   | 79.00%          |
| AW031266.1  | SGN-U594817 | -2.088      | uncharacterized protein                | ---NA---                                                                                                               | 3.73E-88    | 86.55%          |
| TC210888    | SGN-U571356 | -2.082      | ---NA---                               | ---NA---                                                                                                               |             |                 |

| mRNA/EST ID           | UniGene ID         | Fold Change   | Gene Ontology Annotation                          | GO terms                                                                                                                                          | Min. eValue     | Mean Similarity |
|-----------------------|--------------------|---------------|---------------------------------------------------|---------------------------------------------------------------------------------------------------------------------------------------------------|-----------------|-----------------|
| TC210316              | SGN-U585332        | -2.081        | aspartic proteinase-like protein                  | GO:0006096, GO:0007030,<br>GO:0006972, GO:0048513,<br>GO:0006623, GO:0006508,<br>GO:0046686, GO:0009651,<br>GO:0009266, GO:0006833                | 3.96E-65        | 68.30%          |
| TA57069_4081          | SGN-U567188        | -2.075        | unnamed protein product [Vitis vinifera]          | ---NA---                                                                                                                                          | 3.58E-06        | 50.67%          |
| TC192564              | SGN-U579906        | -2.070        | nbs-lrr resistance protein                        | GO:0006915, GO:0006952,<br>GO:0005524                                                                                                             | 2.73E-15        | 70.18%          |
| AK327773.1            | SGN-U577583        | -2.067        | 11-beta-hydroxysteroid dehydrogenase-like         | GO:0009737, GO:0009741,<br>GO:0008202, GO:0009507,<br>GO:0070524, GO:0072582,<br>GO:0072555, GO:0016491                                           | 6.89E-146       | 73.30%          |
| BF112425.1            | SGN-U597303        | -2.066        | translational activator gcn1                      | ---NA---                                                                                                                                          | 8.62E-85        | 93.40%          |
| CN641307.1            | SGN-U596761        | -2.064        | mlo-like protein 6                                | GO:0005488, GO:0005507,<br>GO:0005516, GO:0005622,<br>GO:0005886, GO:0008219,<br>GO:0030001, GO:0046872,<br>GO:0006396, GO:0009817,<br>GO:0016021 | 9.28E-74        | 89.65%          |
| TC203712              | SGN-U577254        | -2.061        | ubiquitin family protein                          | GO:0006511, GO:0004842                                                                                                                            | 3.98E-36        | 58.60%          |
| <b>M83322.1 (ACS)</b> | <b>SGN-U565891</b> | <b>-2.060</b> | <b>1-aminocyclopropane-1-carboxylate synthase</b> | <b>GO:0009693, GO:0030170,</b><br><b>GO:0009835, GO:0016769,</b><br><b>GO:0016847</b>                                                             | <b>4.01E-57</b> | <b>87.70%</b>   |

| mRNA/EST ID | UniGene ID  | Fold Change | Gene Ontology Annotation                               | GO terms                                                                                                                                       | Min. eValue | Mean Similarity |
|-------------|-------------|-------------|--------------------------------------------------------|------------------------------------------------------------------------------------------------------------------------------------------------|-------------|-----------------|
| AW929342.1  | SGN-U577943 | -2.056      | myosin heavy chain                                     | GO:0012505, GO:0016987, GO:0017111, GO:0051301, GO:0051645, GO:0051646, GO:0005524                                                             | 1.32E-59    | 68.85%          |
| AI777063.1  | SGN-U568600 | -2.055      | serine threonine protein                               | GO:0012505, GO:0004672, GO:0010204, GO:0010359, GO:0005515, GO:0005524, GO:0004674, GO:0009626, GO:0016301                                     | 4.23E-99    | 92.10%          |
| AW934352.1  | SGN-U588534 | -2.050      | hydroxyproline-rich glycoprotein family protein        | GO:0005488, GO:0005773, GO:0005886, GO:0005737                                                                                                 | 3.28E-12    | 75.31%          |
| TC212621    | SGN-U576896 | -2.045      | multidrug resistance-associated protein 6 ( 6)<br>abc- | GO:0015700, GO:0046685, GO:0009407, GO:0005634, GO:0000325, GO:0009506, GO:0005774, GO:0005773, GO:0015446, GO:0042626, GO:0071992, GO:0005515 | 0           | 76.55%          |
| DB717813.1  | SGN-U567275 | -2.044      | Zinc ion binding                                       | GO:0008270, GO:0055114                                                                                                                         | 6.76E-21    | 81.30%          |

| mRNA/EST ID | UniGene ID  | Fold Change | Gene Ontology Annotation                                  | GO terms                                                                                                                                                                                                            | Min. eValue | Mean Similarity |
|-------------|-------------|-------------|-----------------------------------------------------------|---------------------------------------------------------------------------------------------------------------------------------------------------------------------------------------------------------------------|-------------|-----------------|
| BT013746.1  | SGN-U570838 | -2.038      | atp binding                                               | GO:0045010, GO:0043481,<br>GO:0006200, GO:0010315,<br>GO:0009926, GO:0010540,<br>GO:0048440, GO:0007155,<br>GO:0071555, GO:0009793,<br>GO:0009640, GO:0009958,<br>GO:0008361, GO:0009733,<br>GO:0009637, GO:0009624 | 0           | 71.50%          |
| AW979814.1  | SGN-U572659 | -2.031      | 1-phosphatidylinositol-4-phosphatase 5-kinase             | GO:0042742, GO:0016310,<br>GO:0007165, GO:0004721                                                                                                                                                                   | 5.75E-26    | 57.95%          |
| TC202160    | SGN-U586008 | -2.028      | probable histone-lysine n-methyltransferase<br>atxr3-like | GO:0005783, GO:0005634,<br>GO:0009506, GO:0016279                                                                                                                                                                   | 6.11E-109   | 77.45%          |
| AW035871.1  | SGN-U573555 | -2.028      | Lactoylglutathione lyase family protein                   | ---NA---                                                                                                                                                                                                            | 1.23E-78    | 80.85%          |
| BM411467.1  | SGN-U564670 | -2.027      | peptidase a1 pepsin                                       | ---NA---                                                                                                                                                                                                            | 9.98E-48    | 50.00%          |
| AK326757.1  | SGN-U578297 | -2.019      | f-box protein pp2-b1                                      | GO:0005515, GO:0005488                                                                                                                                                                                              | 7.39E-43    | 58.75%          |
| CD579120.1  | SGN-U582906 | -2.018      | Dicarboxylate/Tricarboxylate carrier                      | GO:0009693, GO:0006839,<br>GO:0010200, GO:0009612,<br>GO:0009611, GO:0006810,<br>GO:0005743, GO:0005310                                                                                                             |             |                 |
| TC209247    | SGN-U583451 | -2.017      | protein                                                   | ---NA---                                                                                                                                                                                                            | 6.38E-30    | 52.80%          |
| BP908346.1  | SGN-U578022 | -2.014      | protein kiaa0664 homolog                                  | ---NA---                                                                                                                                                                                                            | 8.80E-52    | 60.74%          |
| BI205578.1  |             | -2.006      | integrase core domain containing protein                  | GO:0006310, GO:0003677                                                                                                                                                                                              | 1.16E-27    | 52.90%          |

| mRNA/EST ID     | UniGene ID         | Fold Change  | Gene Ontology Annotation                                           | GO terms                                                                                                                                          | Min. eValue      | Mean Similarity |
|-----------------|--------------------|--------------|--------------------------------------------------------------------|---------------------------------------------------------------------------------------------------------------------------------------------------|------------------|-----------------|
| AK328092.1      | SGN-U578448        | -2.002       | 1-aminocyclopropane-1-carboxylate oxidase                          | GO:0046872, GO:0009693,<br>GO:0006952, GO:0055114,<br>GO:0009835, GO:0031418,<br>GO:0009815                                                       | 0                | 75.50%          |
| FS198129.1      | SGN-U583735        | -2.001       | multiple c2 and transmembrane domain-<br>containing protein 2-like | GO:0008150, GO:0003674                                                                                                                            | 2.14E-80         | 85.35%          |
| DB679092        | SGN-U596485        | 2.002        | trna-dihydrouridine synthase a                                     | ---NA---                                                                                                                                          | 4.41E-36         | 79.40%          |
| AW442644        | SGN-U565915        | 2.013        | protein                                                            | ---NA---                                                                                                                                          | 4.14E-36         | 72.00%          |
| FS205197        | SGN-U603482        | 2.021        | Two-component response regulator ARR17                             | GO:0009736, GO:0006355,<br>GO:0005634, GO:0000156                                                                                                 | 8.45E-06         | 63.67%          |
| DV104534        | SGN-U592284        | 2.041        | endomembrane protein 70                                            | GO:0016023, GO:0016020                                                                                                                            | 3.80E-33         | 86.85%          |
| AK319943.1      | SGN-U577548        | 2.044        | crt homolog 1-like                                                 | GO:0008150, GO:0005634,<br>GO:0005524                                                                                                             | 1.46E-159        | 87.90%          |
| AI778436        | SGN-U577946        | 2.047        | histone h2b                                                        | GO:0008283, GO:0005730,<br>GO:0005634, GO:0003677,<br>GO:0005515                                                                                  | 1.96E-48         | 98.70%          |
| AK329954.1      | SGN-U575325        | 2.057        | udp-glucosyltransferase                                            | GO:0009920, GO:0046482,<br>GO:0010583, GO:0009751,<br>GO:0009407, GO:0009507,<br>GO:0009524, GO:0010294,<br>GO:0005515, GO:0016757,<br>GO:0080002 | 0                | 66.35%          |
| <b>ES895666</b> | <b>SGN-U582479</b> | <b>2.071</b> | <b>pathogenesis-related protein 5-like</b>                         | GO:0009607, GO:0006952                                                                                                                            | <b>4.67E-109</b> | <b>77.15%</b>   |



| mRNA/EST ID | UniGene ID  | Fold Change | Gene Ontology Annotation                                              | GO terms                                                                                    | Min. eValue | Mean Similarity |
|-------------|-------------|-------------|-----------------------------------------------------------------------|---------------------------------------------------------------------------------------------|-------------|-----------------|
| TC203234    | SGN-U574784 | 2.071       | polyphenol oxidase                                                    | GO:0046872, GO:0004097,<br>GO:0009543, GO:0055114,<br>GO:0006118, GO:0006570                | 3.63E-23    | 74.20%          |
| AY359965.1  | SGN-U573229 | 2.079       | Receptor-like protein kinase                                          | GO:0006468, GO:0005524,<br>GO:0004674, GO:0004713                                           | 0           | 59.80%          |
| AJ459817.1  | SGN-U571098 | 2.086       | inorganic pyrophosphatase 2-like                                      | GO:0005768, GO:0005794,<br>GO:0005886, GO:0005802,<br>GO:0005773, GO:0009678                | 0           | 87.10%          |
| AK247334.1  | SGN-U586385 | 2.086       | extensin-like protein                                                 | GO:0006869, GO:0012505,<br>GO:0008289                                                       | 1.49E-58    | 67.00%          |
| BI421975    | SGN-U583705 | 2.120       | xenotropic and polytropic retrovirus receptor                         | GO:0016020                                                                                  | 6.81E-10    | 69.50%          |
| BI923172    | SGN-U575858 | 2.131       | cytochrome p450                                                       | GO:0016023, GO:0009055,<br>GO:0020037, GO:0055114,<br>GO:0019825, GO:0070330,<br>GO:0006118 | 4.93E-68    | 72.15%          |
| BP891736    | SGN-U564623 | 2.133       | protease inhibitor seed storage lipid transfer protein family protein | GO:0016023                                                                                  | 3.65E-15    | 60.20%          |
| BW691204    | SGN-U577212 | 2.133       | WRKY-like transcription factor                                        | GO:0030010, GO:0009942,<br>GO:0006355, GO:0005634,<br>GO:0003700                            |             |                 |
| TC212704    | SGN-U593710 | 2.136       | cytochrome p450                                                       | GO:0016023, GO:0009055,<br>GO:0020037, GO:0055114,<br>GO:0019825, GO:0070330,<br>GO:0006118 | 8.22E-67    | 85.15%          |

| mRNA/EST ID     | UniGene ID         | Fold Change  | Gene Ontology Annotation                            | GO terms                                                                                                                                                                                                | Min. eValue     | Mean Similarity |
|-----------------|--------------------|--------------|-----------------------------------------------------|---------------------------------------------------------------------------------------------------------------------------------------------------------------------------------------------------------|-----------------|-----------------|
|                 |                    |              |                                                     | GO:0008219, GO:0002229,<br>GO:0000165, GO:0009788,<br>GO:0046777, GO:0006487,<br>GO:1900424, GO:1900150,<br>GO:2000031, GO:0009617,<br>GO:0009723, GO:0009620,<br>GO:0009414, GO:0005829,<br>GO:0005769 |                 |                 |
| <b>BF097728</b> | <b>SGN-U564327</b> | <b>2.144</b> | <b>disease resistance response protein 206-like</b> |                                                                                                                                                                                                         | <b>4.14E-75</b> | <b>74.65%</b>   |
| BT013052.1      | SGN-U579408        | 2.162        | proline rich protein                                | GO:0009536                                                                                                                                                                                              | 1.67E-31        | 92.00%          |
| TC217040        | SGN-U593183        | 2.163        | Acyltransferase                                     | GO:0022900, GO:0009055                                                                                                                                                                                  | 1.59E-38        | 85.60%          |
| AK325938.1      | SGN-U578266        | 2.186        | avr9 cf-9 rapidly elicited protein 65               | GO:0005739, GO:0003674                                                                                                                                                                                  | 1.56E-17        | 57.00%          |
| BM410860        | SGN-U564294        | 2.190        | hyphally-regulated cell wall protein                | GO:0044413, GO:0044407,<br>GO:0046658, GO:0009986                                                                                                                                                       | 4.72E-05        | 42.86%          |
|                 |                    |              |                                                     | GO:0010252, GO:0009734,<br>GO:0008283, GO:0042742,                                                                                                                                                      |                 |                 |
| TA36518_4081    | SGN-U581240        | 2.227        | translationally controlled tumor protein            | GO:0009819, GO:0009790,<br>GO:0048527, GO:0007067,<br>GO:0009860                                                                                                                                        | 1.74E-106       | 92.05%          |

| mRNA/EST ID  | UniGene ID  | Fold Change | Gene Ontology Annotation                     | GO terms                                                                                                                                                                                                | Min. eValue | Mean Similarity |
|--------------|-------------|-------------|----------------------------------------------|---------------------------------------------------------------------------------------------------------------------------------------------------------------------------------------------------------|-------------|-----------------|
| BG627276     | SGN-U563117 | 2.241       | Acyl-CoA binding domain containing protein 3 | GO:0006629, GO:0006869,<br>GO:0010029, GO:1900140,<br>GO:0009737, GO:0009409,<br>GO:0010288, GO:0010162,<br>GO:0009505, GO:0005886,<br>GO:0000062, GO:0032791,<br>GO:0008289, GO:0070300,<br>GO:0005515 |             |                 |
| AK326023.1   | SGN-U598751 | 2.277       | nuclease harbil-like                         | ---NA---                                                                                                                                                                                                | 0           | 73.05%          |
| TA54887_4081 | SGN-U575565 | 2.296       | FMN binding                                  | ---NA---                                                                                                                                                                                                |             |                 |
| DB712015     |             | 2.297       | BAP bon1-associated protein 2-like           | GO:0019725, GO:0010286,<br>GO:0009695, GO:0031348,<br>GO:0010200, GO:0009409,<br>GO:0009620, GO:0009408,<br>GO:0009753, GO:0009612,<br>GO:0009751, GO:0009266,<br>GO:0009611                            | 1.04E-48    | 66.85%          |
| AY348872.1   | SGN-U600185 | 2.304       | putative anthocyanin permease                | GO:0009901, GO:0009812,<br>GO:0009555, GO:0016020,<br>GO:0005886, GO:0005774,<br>GO:0015297                                                                                                             | 0           | 83.80%          |

| mRNA/EST ID | UniGene ID  | Fold Change | Gene Ontology Annotation                                            | GO terms                                                                                                                                                                     | Min. eValue | Mean Similarity |
|-------------|-------------|-------------|---------------------------------------------------------------------|------------------------------------------------------------------------------------------------------------------------------------------------------------------------------|-------------|-----------------|
| AW928726    | SGN-U600456 | 2.318       | nc domain-containing protein                                        | GO:0019725, GO:0009690,<br>GO:0045087, GO:0060548,<br>GO:0031348, GO:0009626,<br>GO:0045793, GO:0010186,<br>GO:0009270, GO:0009266,<br>GO:0009697, GO:0009863,<br>GO:0009627 | 4.84E-57    | 80.25%          |
| AI777019    | SGN-U597392 | 2.319       | Sterile alpha motif SAM domain-containing protein                   | ---NA---                                                                                                                                                                     |             |                 |
| AK247916.1  | SGN-U575586 | 2.320       | domains rearranged methyltransferase                                | GO:0008757, GO:0032876,<br>GO:0009825, GO:0010051,<br>GO:0008610, GO:0008168                                                                                                 | 0           | 74.70%          |
| TC205995    | SGN-U565615 | 2.325       | nitrate transporter                                                 | GO:0015112, GO:0009705,<br>GO:0055085, GO:0015706                                                                                                                            | 5.70E-41    | 89.45%          |
| BI205317    | SGN-U604418 | 2.344       | delta-12 fatty acid desaturase                                      | GO:0046471, GO:0005575,<br>GO:0080167, GO:0006636,<br>GO:0009507, GO:0052637                                                                                                 | 1.21E-72    | 88.90%          |
| Z46674.1    | SGN-U568616 | 2.362       | hypothetical protein Pmar_PMAR016250 [Perkinsus marinus ATCC 50983] | ---NA---                                                                                                                                                                     | 7.39E-04    | 62.00%          |
| EG552887    | SGN-U581921 | 2.390       | exocyst complex component sec3a-like                                | GO:0008150, GO:0005829,<br>GO:0000145, GO:0005886                                                                                                                            | 3.33E-13    | 97.85%          |
| AW094391    | SGN-U597189 | 2.411       | hypothetical protein SDM1_29t00007 [Solanum demissum]               | GO:0007018, GO:0005524,<br>GO:0003777, GO:0005874                                                                                                                            | 1.56E-10    | 74.00%          |
| GH622591    | SGN-U586288 | 2.419       | zinc finger                                                         | GO:0010200, GO:0005759,<br>GO:0008270, GO:0009737                                                                                                                            | 1.70E-48    | 60.55%          |

| mRNA/EST ID | UniGene ID  | Fold Change | Gene Ontology Annotation                          | GO terms                                                                                        | Min. eValue | Mean Similarity |
|-------------|-------------|-------------|---------------------------------------------------|-------------------------------------------------------------------------------------------------|-------------|-----------------|
| TC198843    | SGN-U583942 | 2.419       | tir-nbs-irr resistance protein                    | GO:0006915, GO:0006952, GO:0005524                                                              | 8.59E-53    | 73.45%          |
| AI772144    | SGN-U593315 | 2.433       | Transcription factor bHLH 125                     | GO:0005634                                                                                      |             |                 |
| TC211939    | SGN-U566911 | 2.462       | retrotransposon unclassified                      | ---NA---                                                                                        | 1.37E-14    | 60.95%          |
| TC202803    | SGN-U568616 | 2.462       | protease do-like 7-like                           | GO:0005739, GO:0003674                                                                          | 3.09E-92    | 83.30%          |
| TC211768    | SGN-U573464 | 2.499       | chlorophyll synthase                              | GO:0016020, GO:0009536                                                                          | 1.96E-07    | 56.88%          |
| GO376376    | SGN-U571241 | 2.542       | nad -linked oxidoreductase-like protein           | GO:0005886, GO:0016491, GO:0009536, GO:0016020                                                  | 7.56E-107   | 89.60%          |
| AW219006    | SGN-U575716 | 2.567       | calmodulin binding                                | GO:0017118, GO:0005516, GO:0005737, GO:0005886, GO:0006464, GO:0055085, GO:0005242, GO:0016415  | 1.38E-10    | 48.19%          |
| AW039918    | SGN-U583713 | 2.605       | p27-like protein                                  | GO:0008150, GO:0031225, GO:0005634                                                              | 2.96E-103   | 69.35%          |
| BI203929    | SGN-U568616 | 2.635       | merozoite surface antigen                         | ---NA---                                                                                        | 4.61E-11    | 53.05%          |
| TC193612    | SGN-U574954 | 2.635       | cysteine proteinase                               | GO:0009740, GO:0009686, GO:0006508, GO:0009739, GO:0010114, GO:0005576, GO:0008234              | 0           | 70.05%          |
| BG625890    | SGN-U576640 | 2.656       | atp synthase cf1 epsilon subunit                  | GO:0045261, GO:0042777, GO:0009851, GO:0008553, GO:0046933, GO:0005524, GO:0046961, GO:0009535, | 1.10E-13    | 86.00%          |
| AK327760.1  | SGN-U564718 | 2.672       | pi-plc x domain-containing protein at5g67130-like | ---NA---                                                                                        | 0           | 81.60%          |

| mRNA/EST ID | UniGene ID  | Fold Change | Gene Ontology Annotation                                  | GO terms                                                                            | Min. eValue | Mean Similarity |
|-------------|-------------|-------------|-----------------------------------------------------------|-------------------------------------------------------------------------------------|-------------|-----------------|
| AK246885.1  | SGN-U575511 | 2.685       | at hook motif-containing protein                          | GO:0009734, GO:0009640, GO:0009723, GO:0008080                                      | 2.20E-29    | 64.85%          |
| BE353618    | SGN-U562988 | 2.846       | golgi to er traffic protein 4 homolog                     | GO:0071816, GO:0005829, GO:0012505, GO:0004672, GO:0010204, GO:0010359,             | 1.98E-65    | 78.50%          |
| AW930418    | SGN-U583556 | 2.896       | receptor protein kinase                                   | GO:0005515, GO:0005524, GO:0004674, GO:0009626, GO:0016301, GO:0046872, GO:0009693, | 5.44E-35    | 78.35%          |
| BI203720    | SGN-U575527 | 2.916       | 1-aminocyclopropane-1-carboxylate oxidase-like protein    | GO:0006952, GO:0055114, GO:0009835, GO:0031418, GO:0009815, GO:0004523, GO:0003677, | 2.22E-45    | 77.00%          |
| AK325661.1  | SGN-U566912 | 3.247       | retroelement pol polyprotein                              | GO:0006278, GO:0003723, GO:0009401, GO:0006310, GO:0051252, GO:0012505, GO:0005634, | 8.39E-51    | 47.60%          |
| AY093595.1  | SGN-U578601 | 3.272       | osmotin-like protein                                      | GO:0005737, GO:0051707, GO:0009651, GO:0009816, GO:0009817, GO:0045892, GO:0009958, | 0           | 94.55%          |
| ES896576    | SGN-U578580 | 3.861       | calcium-dependent lipid-binding domain-containing protein | O:0009651, GO:0009414, GO:0005783, GO:0031965                                       | 3.47E-76    | 79.95%          |
| DV105097    | SGN-U580440 | 4.166       | DNA binding protein 4                                     | GO:0009536                                                                          |             |                 |
| AK328540.1  | SGN-U578955 | 4.532       | flc-like 1 splice variant 4                               | GO:0003677, GO:0045449                                                              | 1.01E-54    | 69.15%          |

**Table S1. Differentially expressed genes annotation.** The automatic BLAST annotation of sequences was performed by the BLAST2GO software suite and the fold change of transgenic plant compared to relative control cv Red Setter, expectation value (e value), sequence similarity and corresponding Gene Ontology terms were reported (--- NA--- represents sequences not annotated, in bold were reported sequence validated by realtime RT-PCR -see Fig. S2-, in brackets we reported the name of the genes used in the paper)
